# Supplementary material for: Pre-Vaccination COVID-19 Vaccine Literacy in a Croatian Adult Population: A Cross-Sectional Study
Source: MDPI journal article supplement (doi:10.3390/ijerph18137073), 2021-07-02
Supplement: s1 [file s1]

**Table S1.** Factor Loading—PCA

| Variable (English/Croatian)                                                                                                                                                           | Items (English/Croatian)                                                                                                                                                                                            | Factor 1         | Factor 2         |
|---------------------------------------------------------------------------------------------------------------------------------------------------------------------------------------|---------------------------------------------------------------------------------------------------------------------------------------------------------------------------------------------------------------------|------------------|------------------|
| When reading or listening to information about future COVID-19 vaccines or current vaccines: / Kada čitate ili slušate informacije o trenutnim ili budućim cjepivima protiv COVID-19: | 1. Did you find words you did not know? / Jeste li naišli na riječi koje niste znali?                                                                                                                               | 0.142463         | <b>-0.829147</b> |
|                                                                                                                                                                                       | 2. Did you find that the texts were difficult to understand? / Jeste li naišli na tekst koji ste teško razumjeli?                                                                                                   | 0.118460         | <b>-0.879581</b> |
|                                                                                                                                                                                       | 3. Did you need time to understand them? / je li Vam trebalo puno vremena za razumijevanje teksta?                                                                                                                  | 0.168398         | <b>-0.853559</b> |
|                                                                                                                                                                                       | 4. Did you or would you need someone to help you understand them? / Bi li Vam trebao netko tko će Vam pomoći u razumijevanju?                                                                                       | 0.134923         | <b>-0.813179</b> |
| When looking for information about future COVID-19 vaccines or current vaccines: / Kada tražite informacije o trenutnim ili budućim cjepivima protiv COVID-19:                        | 5. Have you consulted more than one source of information? / Razmatrate li u više od jednog izvora informacija?                                                                                                     | <b>-0.650464</b> | -0.224153        |
|                                                                                                                                                                                       | 6. Did you find the information you were looking for? / Jeste li pronašli informacije koje ste tražili?                                                                                                             | <b>-0.686086</b> | 0.031209         |
|                                                                                                                                                                                       | 7. Have you had the opportunity to use the information? / Jeste li imali priliku koristiti informacije?                                                                                                             | <b>-0.689637</b> | -0.028863        |
|                                                                                                                                                                                       | 8. Did you discuss what you understand about vaccinations with your doctor or other people? / Jeste li sa svojim liječnikom ili nekim drugim ljudima (laicima) razgovarali o onome što ste razumjeli o cijepljenju? | <b>-0.667444</b> | -0.145471        |
|                                                                                                                                                                                       | 9. Did you consider whether the information collected was about your condition? / Jeste li razmotrili tiču li se prikupljene informacije i Vašega stanja?                                                           | <b>-0.777003</b> | -0.142782        |
|                                                                                                                                                                                       | 10. Have you considered the credibility of the sources? / Jeste li razmotrili vjerodostojnost izvora?                                                                                                               | <b>-0.840424</b> | -0.063800        |
|                                                                                                                                                                                       | 11. Did you check whether the information was correct? / Jeste li provjerili točnost podataka?                                                                                                                      | <b>-0.830299</b> | -0.065123        |
|                                                                                                                                                                                       | 12. Did you find any useful information with which to make a decision on whether or not to get vaccinated? / Jeste li pronašli korisne informacije za donošenje odluke hoćete li se cijepiti ili ne?                | <b>-0.765684</b> | -0.020569        |

bold - the greatest correlation.
